# Supplementary material
Source: ML conference proceedings conference paper supplement (https://openreview.net/forum?id=ZR-C_YlIf0q)
Supplement: supplementary_material [file attachment]

表格

Example 1: B=5000, c=0.5, 500 replicates

|  |  |  |  |  |
| --- | --- | --- | --- | --- |
| N |  | =1 | =0.5 |  |
| 50 | -0.5 | 0.052 | 0.058 |  |
|  | -1 | 0.056 | 0.052 |  |
|  | -1.5 | 0.058 | 0.066 |  |
| 100 | -0.5 | 0.046 | 0.060 |  |
|  | -1 | 0.056 | 0.064 |  |
|  | -1.5 | 0.056 | 0.060 |  |

Data from R code example4.1

Example 2: B=1000, c=0.5, 1000 replicates

|  |  |  |  |  |
| --- | --- | --- | --- | --- |
| N |  | =2 | =1 |  |
| 50 | 0 | 0.053 | 0.055 |  |
|  | -1 | 0.067 | 0.067 |  |
|  | -0.5 | 0.053 | 0.049 |  |
| 100 | -1 | 0.047 | 0.057 |  |
|  | 0 | 0.053 | 0.051 |  |
|  | -0.5 | 0.058 | 0.063 |  |

Data from R code example2.1

Example 2: B=1000, c=0.1, ，500 replicates

|  |  |  |  |
| --- | --- | --- | --- |
| N |  |  |  |
| 1000 | 1 | 0.050 |  |
|  | 1.4 | 0.058 |  |
|  | 1.2 | 0.048 |  |
| 800 | 1 | 0.068 |  |
|  | 1.2 | 0.052 |  |
|  | 1.4 | 0.068 |  |

Data from R code example2.2
